# Supplementary material
Source: PubMed Central journal article supplement (PMC2975162)
Supplement: supp_M110.129288_jbc.M110.129288-1.pdf [file supp_M110.129288_jbc.M110.129288-1.pdf]

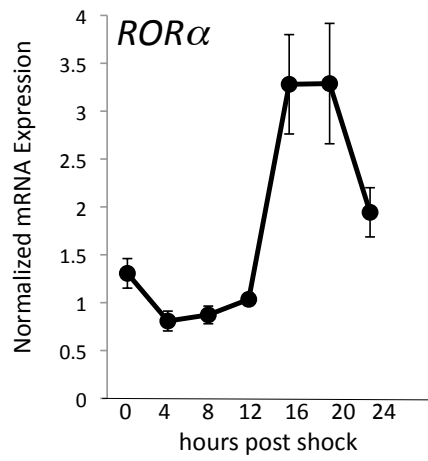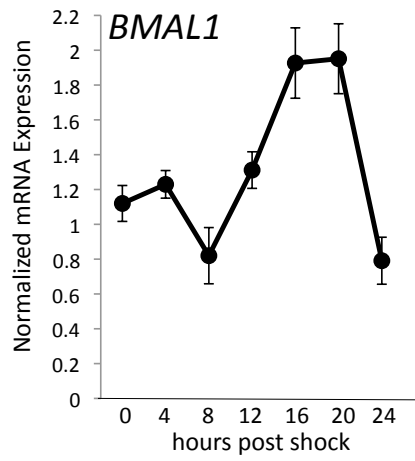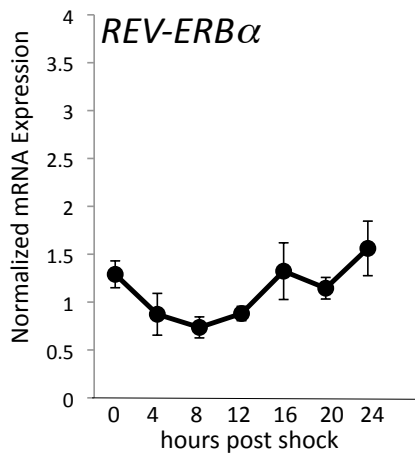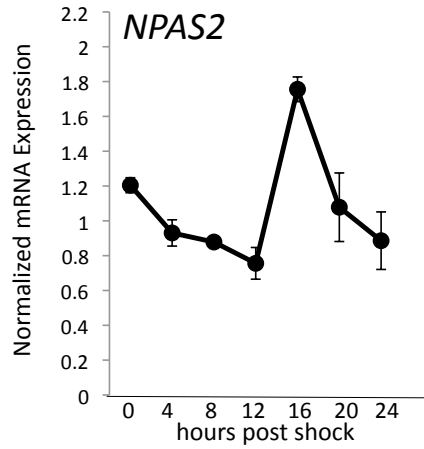

Supplementary Figure 1. Circadian expression of NPAS2, BMAL1, and ROR $\alpha$  in serum shock synchronized HepG2 cells. The expression of NPAS2, BMAL1, ROR $\alpha$  and REV-ERB $\alpha$  mRNA was monitored at every 4 hours post serum shock using QPCR.
